# Supplementary material for: Micro RNAs of Epstein-Barr Virus Promote Cell Cycle Progression and Prevent Apoptosis of Primary Human B Cells
Source: PubMed Central journal article supplement (PMC2924374; doi:10.1371/journal.ppat.1001063), 2010-08-19
Supplement: ppat.1001063.s001.pdf [file ppat.1001063.s001.pdf]

ebv-miR-BART17

ebv-miR-BART17-5pebv-miR-BART17-3p

AJ507799 GUGGCACCC**UAAGAGGACGCAGGCAUACAAG**GUUAAUACCCAGUCCU**UGUAUGCCUGGUGUCCCUAGU**GGGACGC +mirBART

----- wt, ΔmirBHRF1, ΔmirAll

-----

ebv-miR-BART6

ebv-miR-BART6-5pebv-miR-BART6-3p

AJ507799 CUUGUUGGUACUU**UAAGGUUGGUCAAUCCAUAGG**CUUUUUUUGUGAAAACC**CGGGGAUCGGACUAGCCUAGA**GUAACUCAAG +mirBART

----- wt, ΔmirBHRF1, ΔmirAll

-----

ebv-miR-BART21

ebv-miR-BART21-5pebv-miR-BART21-3p

AJ507799 GUAUGGGCUGGGUAAU**UCACUAGUGAAGGCAACUAAC**ACAGUUAGACGUC**CUAGUUGUGCCACUGGUGUUU**AUCCGGUCCCAAU +mirBART

----- wt, ΔmirBHRF1, ΔmirAll

-----

ebv-miR-BART18

ebv-miR-BART18-5pebv-miR-BART18-3p

AJ507799 CGGGUGUCCUGGC**UCAAGUUCGCACUCCUAUACA**GUGUUAAAGCCUUG**UAUCGGAAGUUUGGCUUCGUC**CCAGUGUACUCG +mirBART

----- wt, ΔmirBHRF1, ΔmirAll

-----

ebv-miR-BART7

ebv-miR-BART7\*ebv-miR-BART7

AJ507799 CCAGUGUCCUGAU**CCUGGACCUUGACUAUGAAACA**AUUCUAAAAAAUG**CAUCAUAGUCCAGUGCCAGGG**ACAGUGCACUCGG +mirBART

----- wt, ΔmirBHRF1, ΔmirAll

-----







AJ507799:

miR-BHRF1-1  
nt 41464-41544

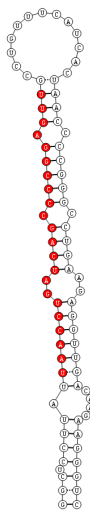

wt / +mirBART

miR-BHRF1-2  
nt 42840-42920

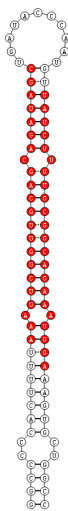

wt / +mirBART

miR-BHRF1-3  
nt 42956-43039

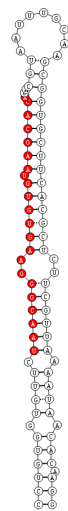

wt / +mirBART

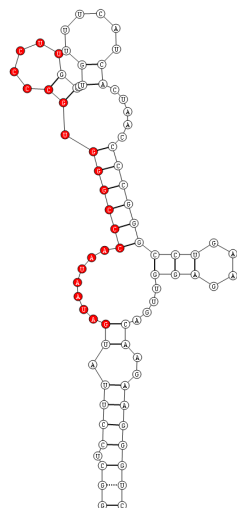

$\Delta$ mirBHRF1 /  $\Delta$ mirAll

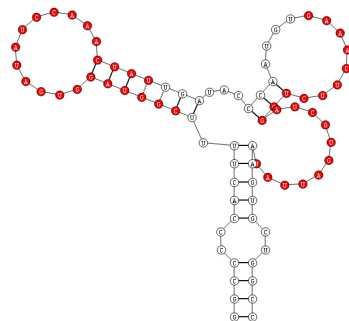

$\Delta$ mirBHRF1 /  $\Delta$ mirAll

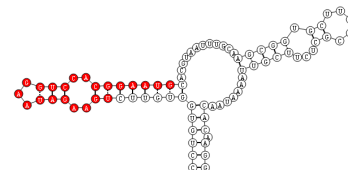

$\Delta$ mirBHRF1 /  $\Delta$ mirAll

AJ507799:

miR-BART3  
nt 139076-139154

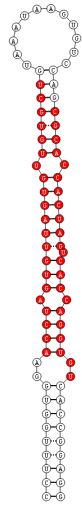

wt / +mirBART / ΔmirBHRF1

miR-BART4  
nt 139215-139299

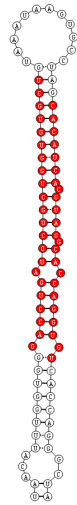

wt / +mirBART / ΔmirBHRF1

miR-BART1  
nt 139340-139417

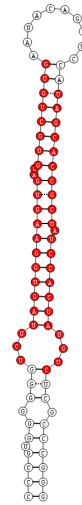

wt / +mirBART / ΔmirBHRF1

miR-BART15  
nt 139507-139584

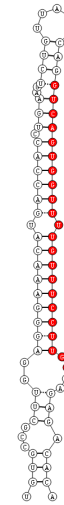

wt / +mirBART / ΔmirBHRF1

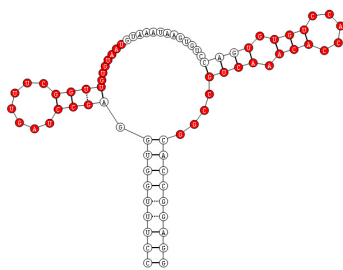

ΔmirAll

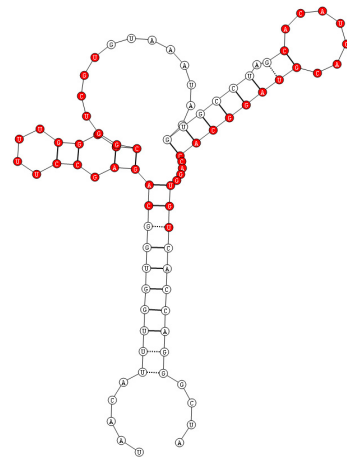

ΔmirAll

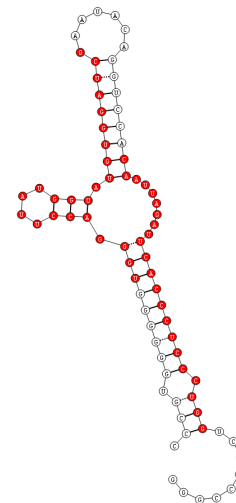

ΔmirAll

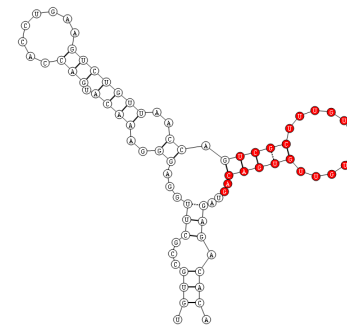

ΔmirAll



AJ507799:

miR-BART5  
nt 139666-139744

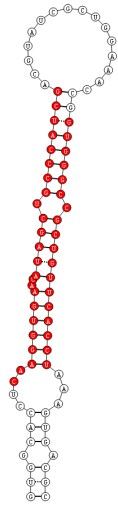

+mirBART

miR-BART16  
nt 139783-139866

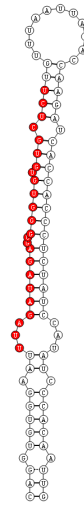

+mirBART

miR-BART17  
nt 139906-139982

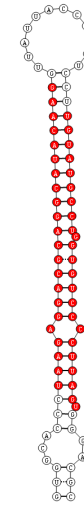

+mirBART

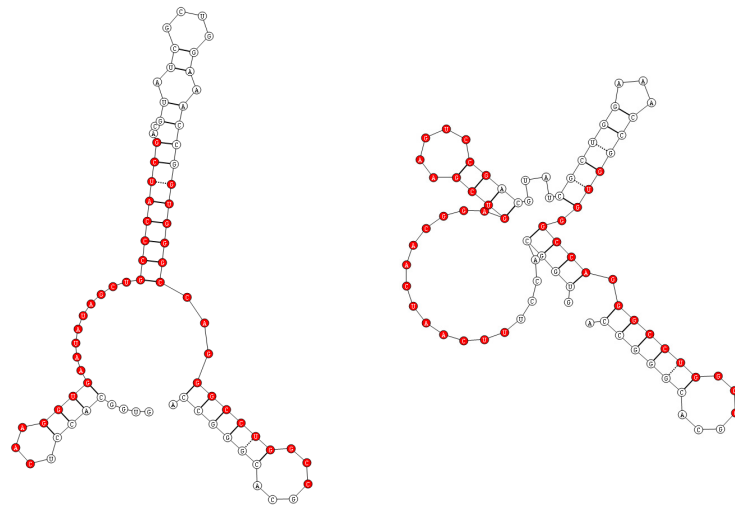

wt

ΔmirBHRF1 / ΔmirAll

*deleted*

wt / ΔmirBHRF1 / ΔmirAll

*deleted*

wt / ΔmirBHRF1 / ΔmirAll

AJ507799:

miR-BART6  
nt 140020-104103

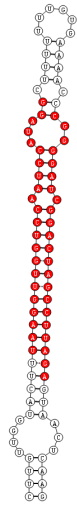

+mirBART

*deleted*

wt /  $\Delta$ mirBHRF1 /  $\Delta$ mirAll

miR-BART21  
nt 145499-145583

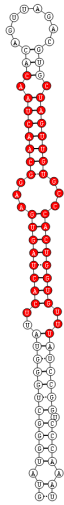

+mirBART

*deleted*

wt /  $\Delta$ mirBHRF1 /  $\Delta$ mirAll

miR-BART18  
nt 145949-145583

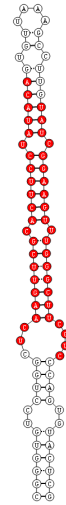

+mirBART

*deleted*

wt /  $\Delta$ mirBHRF1 /  $\Delta$ mirAll

miR-BART7  
nt 146420-146502

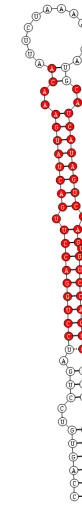

+mirBART

*deleted*

wt /  $\Delta$ mirBHRF1 /  $\Delta$ mirAll

| AJ507799:<br>miR-BART8<br>nt 146759-146840                                                                                    | miR-BART9<br>nt 146947-147031                                                                                                 | miR-BART22<br>nt 147155-147236                                                                                                    | miR-BART10<br>nt 147308-147388                                                                                                    |
|-------------------------------------------------------------------------------------------------------------------------------|-------------------------------------------------------------------------------------------------------------------------------|-----------------------------------------------------------------------------------------------------------------------------------|-----------------------------------------------------------------------------------------------------------------------------------|
| 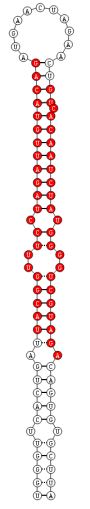 <p data-bbox="425 774 560 813">+mirBART</p> |  <p data-bbox="828 774 963 813">+mirBART</p> |  <p data-bbox="1232 774 1366 813">+mirBART</p> |  <p data-bbox="1635 774 1769 813">+mirBART</p> |
| <p data-bbox="448 1077 537 1109"><i>deleted</i></p> <p data-bbox="358 1356 638 1396">wt / ΔmirBHRF1 / ΔmirAll</p>             | <p data-bbox="851 1077 940 1109"><i>deleted</i></p> <p data-bbox="761 1356 1052 1396">wt / ΔmirBHRF1 / ΔmirAll</p>            | <p data-bbox="1254 1077 1344 1109"><i>deleted</i></p> <p data-bbox="1153 1356 1444 1396">wt / ΔmirBHRF1 / ΔmirAll</p>             | <p data-bbox="1657 1077 1747 1109"><i>deleted</i></p> <p data-bbox="1556 1356 1848 1396">wt / ΔmirBHRF1 / ΔmirAll</p>             |

| AJ507799: | miR-BART11<br>nt 147524-147609                                                    | miR-BART12<br>nt 147888-147970                                                    | miR-BART19<br>nt 148202-148286                                                      | miR-BART20<br>nt 148328-148405                                                      |
|-----------|-----------------------------------------------------------------------------------|-----------------------------------------------------------------------------------|-------------------------------------------------------------------------------------|-------------------------------------------------------------------------------------|
|           |  |  |  |  |
|           | +mirBART                                                                          | +mirBART                                                                          | +mirBART                                                                            | +mirBART                                                                            |
|           | <i>deleted</i>                                                                    | <i>deleted</i>                                                                    | <i>deleted</i>                                                                      | <i>deleted</i>                                                                      |
|           | wt / ΔmirBHRF1 / ΔmirAll                                                          | wt / ΔmirBHRF1 / ΔmirAll                                                          | wt / ΔmirBHRF1 / ΔmirAll                                                            | wt / ΔmirBHRF1 / ΔmirAll                                                            |

AJ507799:

miR-BART13  
nt 148515-148594

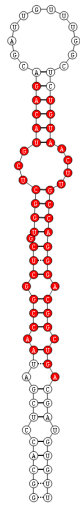

+mirBART

miR-BART14  
nt 148731-148815

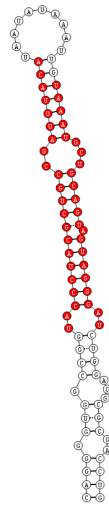

+mirBART

miR-BART2  
nt 152735-152816

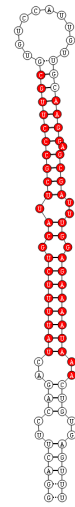

wt / +mirBART / ΔmirBHRF1

*deleted*

wt / ΔmirBHRF1 / ΔmirAll

*deleted*

wt / ΔmirBHRF1 / ΔmirAll

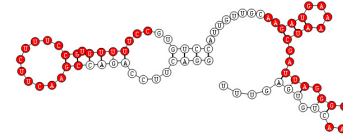

ΔmirAll
