# Supplementary material for: Micro RNAs of Epstein-Barr Virus Promote Cell Cycle Progression and Prevent Apoptosis of Primary Human B Cells
Source: PubMed Central journal article supplement (PMC2924374; doi:10.1371/journal.ppat.1001063), 2010-08-19

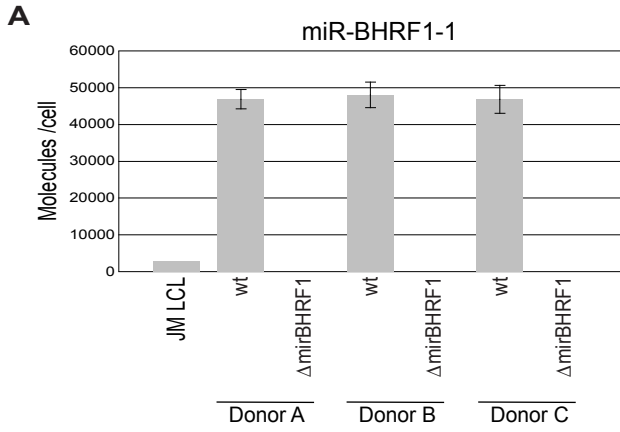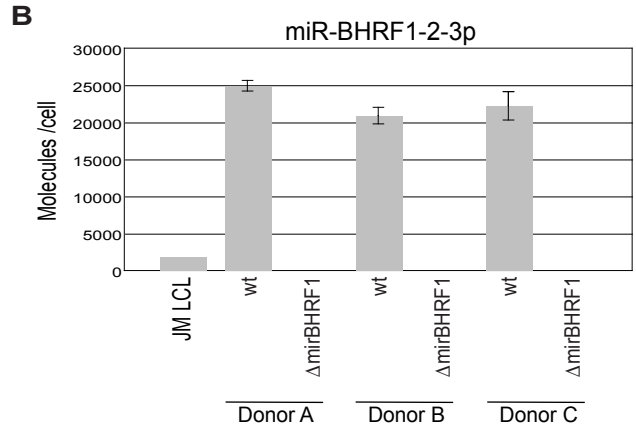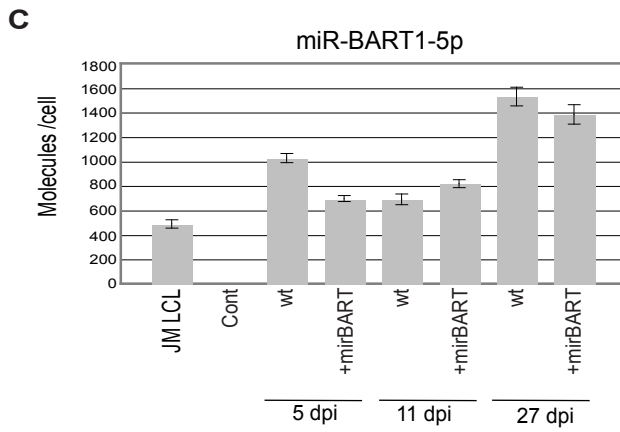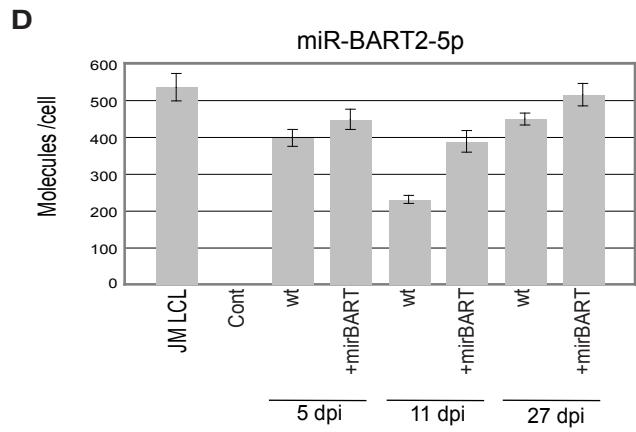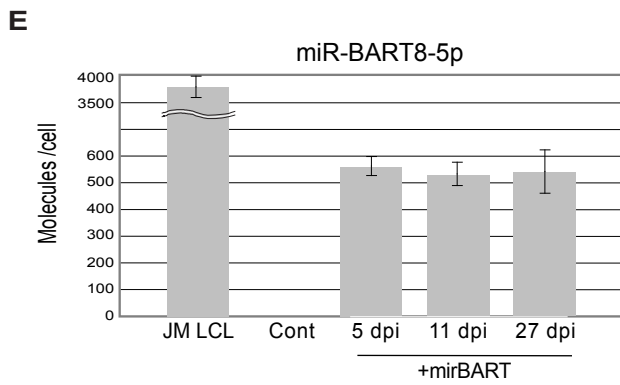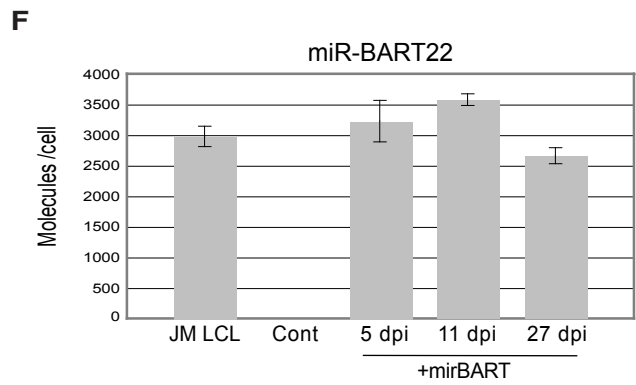

Supplement: ppat.1001063.s004.pdf [file ppat.1001063.s004.pdf]
